# Supplementary material for: Nutrient Profiles of Commercially Produced Complementary Foods Available in Burkina Faso, Cameroon, Ghana, Nigeria and Senegal
Source: MDPI journal article supplement (doi:10.3390/nu15102279), 2023-05-11
Supplement: s1 [file s1]

|                                                                                                              |            |
|--------------------------------------------------------------------------------------------------------------|------------|
| <b>Supplementary Table S1:</b> WHO/FAO (2004) recommended nutrient intakes (RNI) for iron, calcium and zinc. |            |
| Calcium RNI for 6-12 months of age <sup>1</sup>                                                              | 400 mg/day |
| Calcium RNI for 12-36 months of age <sup>1</sup>                                                             | 500 mg/day |
| Iron RNI for 6-12 months of age                                                                              | 9.3 mg/day |
| Iron RNI for 12-36 months of age                                                                             | 5.8 mg/day |
| Zinc RNI for 12-36 months of age <sup>2</sup>                                                                | 4.1 mg/day |
| <sup>1</sup> 10% bioavailability<br><sup>2</sup> Moderate bioavailability                                    |            |
