# Supplementary material for: Nutrient Profiles of Commercially Produced Complementary Foods Available in Burkina Faso, Cameroon, Ghana, Nigeria and Senegal
Source: MDPI journal article supplement (doi:10.3390/nu15102279), 2023-05-11
Supplement: s1 [file s1]

**Supplementary Table S4:** Calcium, iron and zinc content per 100g of commercially products complementary foods, by country.

| Product category                                                    | Serving size<br>(g), median<br>(IQR) | Calcium<br>content<br>declared<br>(n) | Calcium (mg),<br>median (IQR) | Iron<br>content<br>declared<br>(n) | Iron (mg),<br>median<br>(IQR) | Zinc<br>content<br>declared<br>(n) | Zinc<br>(mg),<br>median<br>(IQR) |
|---------------------------------------------------------------------|--------------------------------------|---------------------------------------|-------------------------------|------------------------------------|-------------------------------|------------------------------------|----------------------------------|
| <b>Burkina Faso</b>                                                 |                                      |                                       |                               |                                    |                               |                                    |                                  |
| 1 Dry, powdered and instant cereal/starchy food (n=20)              | 47<br>(44 - 50)                      | 20                                    | 450<br>(322 - 613)            | 20                                 | 9.5<br>(7.5 - 10.7)           | 16                                 | 4.5<br>(4.3 - 5.5)               |
| <b>Cameroon</b>                                                     |                                      |                                       |                               |                                    |                               |                                    |                                  |
| 1 Dry, powdered and instant cereal/starchy food (n=46)              | 45<br>(35 - 49)                      | 38                                    | 450<br>(388 - 662)            | 42                                 | 8.0<br>(5.7 - 10.5)           | 27                                 | 5.5<br>(4.5 - 5.5)               |
| 2 Soft-wet spoonable, ready-to-eat foods (purees) (n=6)             | 200<br>(148 - 200)                   | 2                                     | 65<br>(63 - 67)               | 1                                  | 0.9<br>(--)                   | 0                                  | --                               |
| <b>Ghana</b>                                                        |                                      |                                       |                               |                                    |                               |                                    |                                  |
| 1 Dry, powdered and instant cereal/starchy food (n=54)              | 32<br>(20 - 50.0)                    | 26                                    | 392<br>(316 - 450)            | 35                                 | 10.0<br>(7.6 - 15.0)          | 28                                 | 5.5<br>(4.5 - 6.1)               |
| 2 Soft-wet spoonable, ready-to-eat foods (purees) (n=69)            | 130<br>(125 - 205)                   | 10                                    | 74<br>(26 - 435)              | 7                                  | 4.8<br>(2.1 - 6.0)            | 4                                  | 2.5<br>(1.8 - 3.2)               |
| 4 Dry finger foods and snacks (n=4)                                 | 8<br>(5 - 8)                         | 2                                     | 304<br>(300 - 307)            | 2                                  | 5.8<br>(5.6 - 5.9)            | 1                                  | 4.0<br>(--)                      |
| 5 Juices and other drinks (n=4)                                     | 237                                  | 0                                     | --                            | 0                                  | --                            | 0                                  | --                               |
| <b>Nigeria</b>                                                      |                                      |                                       |                               |                                    |                               |                                    |                                  |
| 1 Dry, powdered and instant cereal/starchy food (n=75) <sup>1</sup> | 30<br>(25 - 50)                      | 55                                    | 450<br>(226 - 511)            | 62                                 | 10.5<br>(6.9 - 14.4)          | 42                                 | 5.0<br>(2.6 - 7.0)               |
| 2 Soft-wet spoonable, ready-to-eat foods (purees) (n=17)            | 100<br>(100 - 120)                   | 4                                     | 42<br>(12 - 71)               | 3                                  | 0.4<br>(0.3 - 0.7)            | 0                                  | --                               |
| 4 Dry finger foods and snacks (n=14)                                | 15<br>(7 - 50)                       | 5                                     | 390<br>(286 - 390)            | 5                                  | 11.0<br>(7.0 - 20.0)          | 1                                  | 2.2                              |
| 5 Juices and other drinks (n=2)                                     | 118.0                                | 1                                     | 0.0<br>(--)                   | 1                                  | 0.0<br>(--)                   | 1                                  | 0.0<br>(--)                      |
| <b>Senegal</b>                                                      |                                      |                                       |                               |                                    |                               |                                    |                                  |
| 1 Dry, powdered and instant cereal/starchy food (n=76)              | 44<br>(27 - 50)                      | 50                                    | 306<br>(190 - 437)            | 68                                 | 9.0<br>(7.6 - 11.3)           | 42                                 | 4.5<br>(2.2 - 7.0)               |
| 2 Soft-wet spoonable, ready-to-eat foods (purees) (n=194)           | 100<br>(100 - 120)                   | 26                                    | 96<br>(65 - 100)              | 3                                  | 1.0                           | 3                                  | 1.5<br>(1.1 - 1.5)               |
| 3 Meals (n=49)                                                      | 250<br>(235 - 250)                   | 3                                     | 60<br>(60 - 65)               | 1                                  | 0.9<br>(--)                   | 0                                  | --                               |
| 4 Dry finger foods and snacks (n=10)                                | 10<br>(9 - 12)                       | 2                                     | 320                           | 3                                  | 7.0<br>(6.8 - 7.3)            | 0                                  | --                               |
| 5 Juices and other drinks (n=19)                                    | -- <sup>2</sup>                      | 16                                    | 72<br>(69 - 77)               | 16                                 | 1.10<br>(0.7 - 1.3)           | 16                                 | 0.3<br>(0.3 - 0.4)               |

<sup>1</sup> Three products excluded from the micronutrient analyses due to unclear iron/calcium/zinc content values reported on labels<sup>2</sup> No products declared serving size
