# Supplementary material for: Nutrient Profiles of Commercially Produced Complementary Foods Available in Burkina Faso, Cameroon, Ghana, Nigeria and Senegal
Source: MDPI journal article supplement (doi:10.3390/nu15102279), 2023-05-11
Supplement: s1 [file s1]

**Supplementary Table S3.** Total sugar, sodium, protein and total fat content per 100g of commercially produced complementary food products, by country<sup>1</sup>.

| Product category                                   | n <sup>2</sup> | Total sugar<br>per 100g<br>(g) | n <sup>2</sup> | Sodium<br>per 100g<br>(mg) | n <sup>2</sup> | Protein per<br>100g<br>(g) | n <sup>2</sup> | Total fat per<br>100g<br>(g) |
|----------------------------------------------------|----------------|--------------------------------|----------------|----------------------------|----------------|----------------------------|----------------|------------------------------|
| <b>Burkina Faso (n=20)</b>                         |                |                                |                |                            |                |                            |                |                              |
| 1.1 Dry or instant cereals/starches                | 7              | 32.0<br>[27.6-36.0]            | 20             | 135<br>[110-176]           | 17             | 15.0<br>[14.6-15.0]        | 20             | 9.7<br>[6.2-10.0]            |
| <b>Cameroon (n=52)</b>                             |                |                                |                |                            |                |                            |                |                              |
| 1.1 Dry or instant cereals/starches                | 23             | 32.2<br>[23.0-35.0]            | 39             | 130<br>[100-160]           | 44             | 15.0<br>[14.0-15.7]        | 42             | 4.3<br>[3.5-9.5]             |
| 2.1 Dairy-based desserts and cereal products       | 1              | 7.2<br>[--]                    | 1              | 30<br>[--]                 | 1              | 2.7<br>[--]                | 1              | 2.5<br>[--]                  |
| 2.2 Fruit puree                                    | 2              | 9.4<br>[8.7-10.0]              | 2              | 7<br>[3-10]                | 2              | 0.5<br>[0.4-0.5]           | 2              | 0.1<br>[0.0-0.1]             |
| 2.4 Vegetable puree with cereals                   | 1              | 4.8<br>[--]                    | 1              | 60<br>[--]                 | 1              | 2.3<br>[--]                | 1              | 2.3<br>[--]                  |
| 2.6 Pureed meal with meat/fish in product name     | 0              | -                              | 0              | -                          | 1              | 3.2<br>[--]                | 1              | 0.9<br>[--]                  |
| 2.7 Pureed meal with meat/fish not in product name | 0              | -                              | 0              | -                          | 1              | 2.8<br>[--]                | 1              | 0.9<br>[--]                  |
| <b>Ghana (n=127)</b>                               |                |                                |                |                            |                |                            |                |                              |
| 1.1 Dry or instant cereals/starches                | 24             | 26.7<br>[12.9-32.9]            | 46             | 135<br>[12-191]            | 49             | 10.3<br>[6.7-15.0]         | 48             | 5.3<br>[3.3-9.0]             |
| 2.1 Dairy-based desserts and cereal products       | 12             | 7.3<br>[1.1-15.6]              | 13             | 40<br>[24-51]              | 14             | 2.5<br>[1.7-3.0]           | 14             | 2.0<br>[1.3-3.0]             |
| 2.2 Fruit puree                                    | 31             | 8.9<br>[7.2-10.8]              | 42             | 8<br>[1-12]                | 42             | 0.6<br>[0.4-1.0]           | 42             | 0.1<br>[0.0-0.7]             |
| 2.3 Vegetable only puree                           | 2              | 4.1<br>[3.7-4.4]               | 4              | 16<br>[5-33]               | 4              | 3.1<br>[0.9-5.5]           | 4              | 0.1<br>[0.0-0.1]             |
| 2.4 Vegetable puree with cereals                   | 0              | -                              | 2              | 4<br>[1-7]                 | 2              | 0.9<br>[0.4-1.3]           | 2              | 0.2<br>[0.1-0.3]             |
| 2.5 Pureed meal with cheese                        | 1              | 3.0<br>[--]                    | 1              | 127<br>[--]                | 1              | 0.5<br>[--]                | 1              | 0.0<br>[--]                  |
| 2.6 Pureed meal with meat/fish in product name     | 1              | 0.7<br>[--]                    | 1              | 40<br>[--]                 | 1              | 3.5<br>[--]                | 1              | 1.7<br>[--]                  |
| 2.7 Pureed meal with meat/fish not in product name | 5              | 2.3<br>[1.7-2.8]               | 5              | 12<br>[12-30]              | 5              | 2.9<br>[2.7-3.2]           | 5              | 2.3<br>[1.7-2.4]             |
| 4.3 Snacks and finger foods                        | 4              | 21.1<br>[17.7-27.7]            | 4              | 120<br>[60-143]            | 4              | 6.7<br>[3.4-7.9]           | 4              | 10.4<br>[5.4-11.5]           |
| <b>Nigeria (n=109)</b>                             |                |                                |                |                            |                |                            |                |                              |
| 1.1 Dry or instant cereals/starches                | 30             | 32.1<br>[24.3-34.1]            | 59             | 132<br>[76-191]            | 67             | 14.3<br>[9.0-15.5]         | 70             | 8.2<br>[3.2-10.0]            |
| 2.1 Dairy-based desserts and cereal products       | 3              | 6.7<br>[6.6-7.5]               | 3              | 1<br>[0.0-32]              | 3              | 2.4<br>[1.2-2.9]           | 3              | 2.0<br>[0.1-2.5]             |
| 2.2 Fruit puree                                    | 10             | 10.2<br>[9.9-10.9]             | 11             | 0<br>[0-1]                 | 11             | 0.6<br>[0.3-0.9]           | 11             | 0.2<br>[0.0-0.4]             |
| 2.4 Vegetable puree with cereals                   | 1              | 4.7<br>[--]                    | 1              | 3<br>[--]                  | 1              | 2.4<br>[--]                | 1              | 0.9<br>[--]                  |
| 2.6 Pureed meal with meat/fish in                  | 1              | 4.7                            | 1              | 15                         | 1              | 1.8                        | 1              | 0.9                          |

| product name                                       |    | [--]                |    | [--]           |    | [--]             |    | [--]               |
|----------------------------------------------------|----|---------------------|----|----------------|----|------------------|----|--------------------|
| 2.7 Pureed meal with meat/fish not in product name | 1  | 0.2<br>[--]         | 1  | 48<br>[--]     | 1  | 2.6<br>[--]      | 1  | 0.6<br>[--]        |
| 4.3 Snacks and finger foods                        | 10 | 28.0<br>[14.3-43.1] | 12 | 181<br>[6-204] | 12 | 6.0<br>[0.0-7.5] | 12 | 10.2<br>[0.0-22.0] |

### Senegal (n=333)

|                                                    |    |                     |    |                |    |                    |    |                     |
|----------------------------------------------------|----|---------------------|----|----------------|----|--------------------|----|---------------------|
| 1.1 Dry or instant cereals/starches                | 43 | 25.1<br>[17.3-32.7] | 73 | 76<br>[17-130] | 75 | 11.0<br>[9.0-14.0] | 76 | 3.2<br>[1.4-7.8]    |
| 2.1 Dairy-based desserts and cereal products       | 30 | 8.4<br>[7.6-9.2]    | 30 | 40<br>[30-40]  | 30 | 2.9<br>[2.6-3.2]   | 30 | 3.1<br>[2.7-3.2]    |
| 2.2 Fruit puree                                    | 77 | 10.0<br>[9.0-11.0]  | 79 | 3<br>[3-5]     | 80 | 0.5<br>[0.4-0.5]   | 80 | 0.2<br>[0.1-0.5]    |
| 2.3 Vegetable only puree                           | 29 | 2.1<br>[0.9-3.1]    | 30 | 19<br>[10-28]  | 30 | 1.1<br>[0.8-1.6]   | 30 | 0.5<br>[0.2-1.1]    |
| 2.4 Vegetable puree with cereals                   | 21 | 2.2<br>[1.8-3.4]    | 21 | 20<br>[13-31]  | 21 | 2.0<br>[1.3-2.4]   | 21 | 1.7<br>[1.1-1.9]    |
| 2.5 Pureed meal with cheese                        | 3  | 1.5<br>[1.0-1.6]    | 3  | 80<br>[30-80]  | 3  | 3.3<br>[3.2-4.5]   | 3  | 2.7<br>[2.4-2.8]    |
| 2.6 Pureed meal with meat/fish in product name     | 1  | 0.5<br>[--]         | 1  | 32<br>[--]     | 3  | 3.4<br>[3.3-3.5]   | 3  | 1.3<br>[1.0-1.4]    |
| 2.7 Pureed meal with meat/fish not in product name | 26 | 1.9<br>[1.6-2.3]    | 26 | 26<br>[20-30]  | 27 | 2.7<br>[2.3-2.9]   | 27 | 1.9<br>[1.6-2.0]    |
| 3.1 Chunky meal with meat/fish/cheese              | 24 | 1.4<br>[1.1-1.7]    | 24 | 99<br>[94-110] | 24 | 2.8<br>[2.5-3.0]   | 24 | 2.2<br>[2.0-2.6]    |
| 3.2 Chunky meal with vegetables                    | 25 | 1.8<br>[1.3-2.8]    | 25 | 97<br>[60-99]  | 25 | 2.3<br>[1.6-2.7]   | 25 | 2.0<br>[1.8-2.7]    |
| 4.3 Snacks and finger foods                        | 10 | 17.3<br>[16.0-25.5] | 10 | 50<br>[40-124] | 10 | 6.4<br>[6.1-8.5]   | 10 | 13.6<br>[12.0-23.2] |

<sup>1</sup>Values are presented as median [interquartile range]

<sup>2</sup>Products without relevant nutrient content declarations on label are excluded
